# Supplementary material for: Memantine loaded PLGA PEGylated nanoparticles for Alzheimer’s disease: in vitro and in vivo characterization
Source: PubMed Central journal article supplement (PMC5870370; doi:10.1186/s12951-018-0356-z), 2018-03-27
Supplement: 12951_2018_356_MOESM1_ESM.pdf [file 12951_2018_356_MOESM1_ESM.pdf]

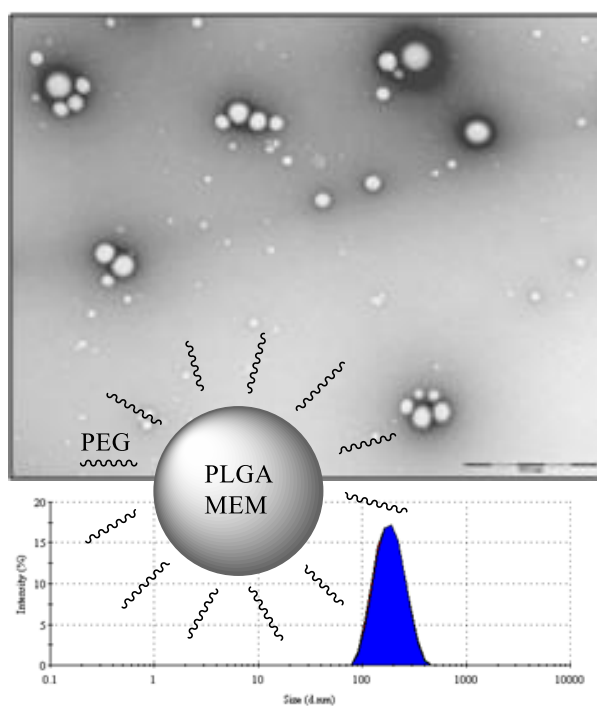

**Figure S1.** MEM-PLGA-PEG NPs transmission electron microscopy and size distribution obtained by dynamic light scattering.

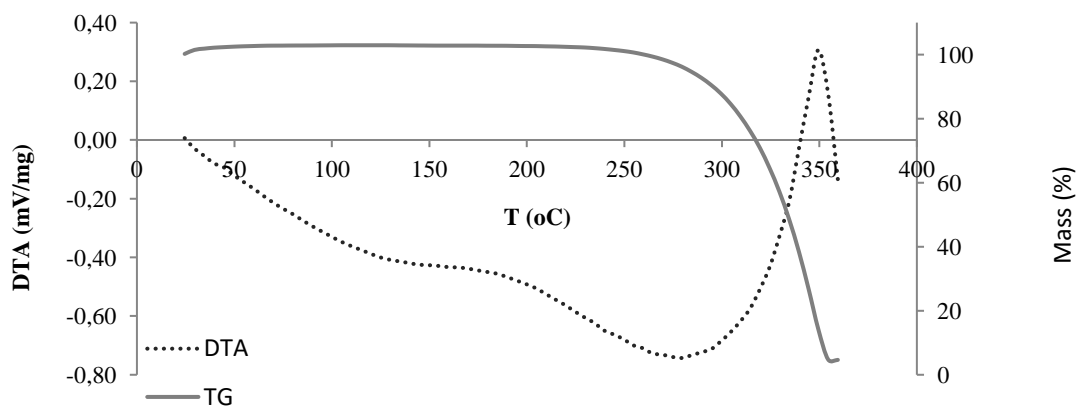

**Figure S2.** MEM thermogravimetric and differential thermal analysis.

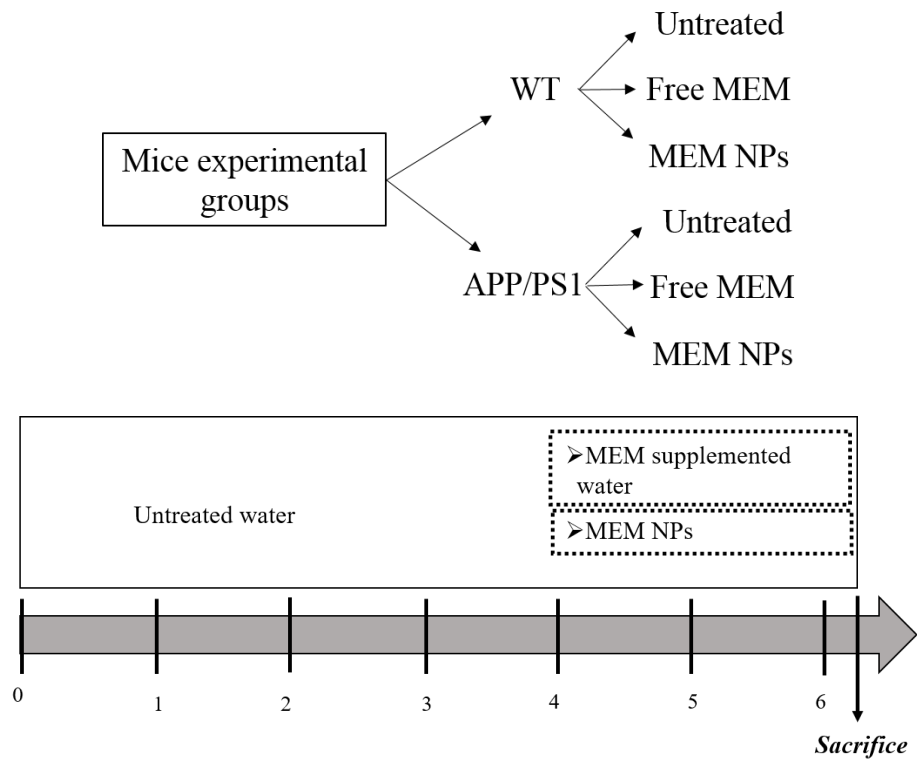

**Figure S3.** A) Experimental groups involved on the study, B) *In vivo* Timeline

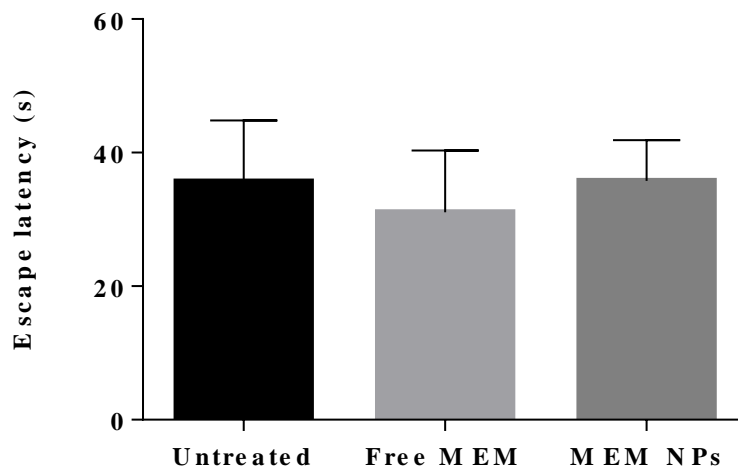

**Figure S4.** Escape latency results of the Morris water maze test on the probe trail of the WT mice.
